1 A constitutively expressed antifungal peptide protects *Tenebrio*  
2 *molitor* during a natural infection by the entomopathogenic  
3 fungus *Beauveria bassiana*.

4 Sevasti Maistrou<sup>1</sup>, Véronique Paris<sup>2</sup>, Annette B. Jensen<sup>1</sup>, Jens Rolff<sup>2</sup>, Nicolai V.  
5 Meyling<sup>1\*</sup>, Caroline Zanchi<sup>2\*</sup>

6 <sup>1</sup> University of Copenhagen, Department of Plant and Environmental Sciences,  
7 Thorvaldsensvej 40, 1871 Frederiksberg, Copenhagen

8 <sup>2</sup> Free University Berlin, Evolutionary Biology, Königin-Luise-Straße 1-3, 14195  
9 Berlin, Germany

10 \* **Correspondence to:**

11 [nvm@plen.ku.dk](mailto:nvm@plen.ku.dk)

12 [caroline.zanchi@uni-muenster.de](mailto:caroline.zanchi@uni-muenster.de)

13 Present address : Westfälische Wilhelms Universität, Institute for Evolution &  
14 Biodiversity, Hüfferstraße 1, 48149 Münster, Germany

15

16 Keywords : antifungal peptide, constitutive immune defense, *Beauveria bassiana*,  
17 *Tenebrio molitor*

18 ORCID

19 *Caroline Zanchi* <http://orcid.org/0000-0003-4097-9375>

20 *Jens Rolff* <http://orcid.org/0000-0002-1529-5409>

21 *Nicolai V. Meyling* <http://orcid.org/0000-0003-3025-4370>

22 *Annette B. Jensen* <http://orcid.org/0000-0002-2044-2274>

## 23 1. Introduction

24 Fungal pathogens infect a great variety of host species including humans, such as  
25 *Candida albicans*, *Naegleria fowleri*, *Aspergillus* sp., or are pests of economically  
26 important crops, such as *Fusarium oxysporum* (Fisher et al., 2012). Fungal pathogens  
27 of insects, called entomopathogenic fungi, share millions of years of coevolution with  
28 their insect hosts (Boomsma et al., 2014; Joop & Vilcinskis, 2016). These fungi play an  
29 important role in controlling insect populations in natural ecosystems by causing  
30 epizootics (Hesketh et al., 2010), thus exerting a strong selection pressure on their  
31 hosts. The relatively short life-cycles of most insects and entomopathogenic fungi, as  
32 well as the knowledge of virulence factors of the fungus (Samuels et al., 1988 ; Hajek  
33 & St. Leger, 1994 ; Valero-Jimenez et al., 2016) and immune reactions of the insect  
34 host (Butt et al., 2016), make these organisms a attractive models for the study of  
35 host-pathogen interactions. Because most entomopathogenic fungi are necrotrophic  
36 parasites (i.e. need to kill their host in order to complete their life cycle), they have  
37 been extensively studied in the context of biocontrol (Lacey et al., 2015).

38 The entomopathogenic fungus *Beauveria bassiana* (Ascomycota: Hypocreales) infects a  
39 broad range of hosts (Ferron, 1978 ; Inglis et al., 2001) such as ants (Broome et al.,  
40 1976), termites (Culliney & Grace, 2000), agricultural pests such as grasshoppers  
41 (Bidochka & Khachatourians, 1991) and arthropod vectors of human diseases (Clark  
42 et al., 1968 ; Kirkland et al., 2004 ; Marti et al., 2005). Once *B. bassiana* conidia land  
43 on a potential host, they attach to the cuticle, germinate and penetrate the cuticular

44 barrier by a combination of mechanical pressure and enzymatic secretions (Ortiz-  
45 Urquiza & Keyhani, 2013). When the fungus reaches the hemolymph, it differentiates  
46 into yeast-like, thin-walled blastospores or hyphal bodies, which divide and exploit  
47 host nutrients. After the death of the host and after catabolizing its last nutrients,  
48 hyphae are produced which breach the cuticle from the inside and form conidia at the  
49 surface of the cadaver, thereby completing the asexual life cycle of the fungus (Ortiz-  
50 Urquiza and Keyhani 2013 ; Pedrini et al. 2013).

51 Once conidia come in contact with the host, the first line of defense is the cuticle that  
52 forms a mechanical barrier which, in combination with defenses such as cuticular  
53 hydrocarbons (Boyle & Cutler, 2012 ; Lopes et al., 2015), and protease inhibitors (Li et  
54 al., 2012), have been well studied for their role in host resistance (Ortiz-Urquiza &  
55 Keyhani, 2013). When the cuticle has been breached, the fungus will face the effectors  
56 of the insect immune system, where immune reactions relying on immune cells and  
57 the phenoloxidase pathway, such as phagocytosis (Gillespie et al., 2000),  
58 encapsulation and nodule formation (Lord et al., 2002), have been shown to play a  
59 central role in the suppression and clearance of *B. bassiana* from the host hemolymph.

60

61 However, insects also possess a battery of antimicrobial peptides (AMPs), small  
62 cationic peptides showing a relatively broad spectrum of antimicrobial activity ranging  
63 from Gram positive and/or negative bacteria, protozoans, viruses, and fungi (Bulet et  
64 al., 1999 ; Hancock, 2000 ; Peschel & Sahl, 2006 ; Mylonakis et al., 2016).

65 AMPs have attracted a lot of attention in the context of bacterial infections (Yokoi et  
66 al., 2012 ; Johnston et al., 2014) and because of their potential as new therapeutical  
67 agents (Zasloff, 2002). Some AMPs have shown antifungal activity either while being  
68 also antibacterial (Levashina et al., 1995 ; Hekengren & Hultmark, 1999 ; Lamberty et  
69 al., 2001a), or solely antifungal (Ijima et al., 1993 ; Fehlbaum et al., 1994 ; Schuhmann  
70 et al., 2003 ; Lamberty et al., 2001b). The antifungal activity of these AMPs has often  
71 been deduced from *in vitro* tests against opportunistic fungi (Levashina et al., 1995 ;  
72 Souhail et al., 2016 ; Fehlbaum et al., 1994 ; Yuan et al., 2007 ; Gao & Zhu, 2008 ;  
73 Tian et al., 2008, Zhang & Zhu 2009 ; Yang et al., 2006 ; Liu et al., 2016 ; Kim et al.,  
74 2001), but only a few times against ecologically relevant pathogens of insects  
75 (Hekengren & Hultmark, 1999 ; Tzou et al., 2002 ; Lu et al., 2016 ; Lamberty et al.,  
76 2001b). Moreover, the *in vitro* spectrum of activity of AMPs is not always transposable  
77 *in vivo* (Zanchi et al., 2017). This makes their contribution to insect fitness in case of a  
78 natural infection hard to predict, especially regarding peptides whose expression is not  
79 elicited by a fungal infection. In the mealworm beetle, *Tenebrio molitor* (Coleoptera:  
80 Tenebrionidae), it has recently been shown that an infection with *B. bassiana*  
81 activated the Toll pathway which lead to the expression of some antimicrobial  
82 peptides among such as the defensin Tenecin 1 and the coleopteracin Tenecin 2 (Yang  
83 et al., 2017), and that the knock down of this pathway decreased the survival of fungal  
84 infected beetles. However, the contribution of the constitutively expressed thaumatin  
85 Tenecin 3 (Makarova et al., 2016 ; Johnston et al., 2014 ; Yang et al., 2017) during *B.*  
86 *bassiana* infection in *T. molitor* is unknown.

87 It is commonly assumed that immune defense, including the production of  
88 antimicrobial peptides, comes at a cost (Johnston et al., 2014 ; Poulsen et al., 2002),  
89 and that its fitness benefits for the host have to outweigh these costs in order to evolve  
90 (Schmid-Hempel, 2005). Thus, we can expect the constitutive expression of Tenecin 3  
91 to confer a benefit to *T. molitor* in the case of a natural fungal infection. The spectrum  
92 of activity of Tenecin 3 has been investigated *in vitro* towards several bacterial species  
93 whose growth were not affected, and against two opportunistic fungi, *Candida*  
94 *albicans* and *Saccharomyces cerevisiae* against which it was active (Kim et al., 1998 ;  
95 Kim et al., 2001).

96 In this study, we used the *Tenebrio molitor* - *Beauveria bassiana* model system to shed  
97 light on the contribution of a constitutively expressed antifungal peptide to host  
98 defense against a fungal infection. We used a gene knock-down approach by RNA  
99 interference on Tenecin 3, and monitored in parallel host fitness in terms of survival,  
100 and fungal fitness in terms of dynamics of within-host growth. We also performed an  
101 *in vitro* experiment in order to confirm the fungicidal effect of Tenecin 3 on *B.*  
102 *bassiana*.

103 Understanding the contribution of specific elements of the insect immune system in  
104 the resistance towards *B. bassiana* can help explain the success or failure of biocontrol  
105 strategies, as well as improve our understanding of the evolution of constitutive  
106 antifungal peptides as a defense mechanism.

## 107 **2. Materials and Methods**

### 108 **2.1. Insect rearing**

109 Larvae of the mealworm beetle (*Tenebrio molitor*) were purchased from a supplier and  
110 maintained at 25°C in the dark in plastic boxes (18 x 18 x 8 cm) at a density of 500  
111 larvae in 400 g of wheat bran supplemented with rat chow. Fresh apple and albumin  
112 (from chicken egg white, Sigma) were added to the boxes every third day. Nymphs  
113 were collected every second day and kept apart until emergence. Newly emerged adult  
114 beetles were placed individually into grid boxes with wheat bran and a piece of filter  
115 paper. They received a piece of apple and ~1g of albumin twice a week. Beetles of both  
116 sexes, aged 8-12 days post-hatching were used for the experiments.

117

### 118 **2.2. Fungal cultures and conidia suspensions**

119 A *Beauveria bassiana* strain (KVL 03-144) isolated from a natural infection of  
120 *Leptopterna dolobrata* (Homoptera: Miridae) from an agroecosystem in Denmark  
121 (Meyling et al., 2009) was kept at -80°C in a culture collection at the University of  
122 Copenhagen before cultivation. Isolates were cultivated on quarter-strength  
123 Sabouraud Dextrose Agar + Yeast 10 % (SDAY) and incubated for 10 days at 23°C to  
124 allow for sporulation. Conidia were collected by scrapping the surface of the culture  
125 with a sterile loop and transferred in 1 ml PBS with 0.05% of Triton-X. The resulting  
126 solution was centrifuged twice at 23°C, 4000 rpm for 3.5 min and the supernatant

127 discarded in order to remove agar and hyphae. The pellet was resuspended in 1 ml  
128 Phosphate Buffered Saline (PBS) + Triton-X 0.05%, and the conidia concentration  
129 assessed with a hemocytometer (Neubauer improved). The concentration of the  
130 inoculum was adjusted through serial dilutions before exposing the beetles. After each  
131 infection bout, the germination rate of the inoculum was assessed by plating 100  $\mu$ L of  
132 a  $10^5$  conidia/ml solution on quarter strength SDAY 10% plates. After incubation for  
133 24 h at 23°C the germination of 3 x 100 conidia was counted. We discarded any batch  
134 of beetles that turned out to be infected with an inoculum of a germination rate lower  
135 than 90%.

136

### 137 **2.3. Gene knock-down by RNA interference**

138 We used RNA interference to knock down the expression of the *tenecin 3* gene. RNAi  
139 has been previously shown to be efficient in *Tribolium castaneum* (Coleoptera:  
140 Tenebrionidae) and *T. molitor* (Fabrick et al., 2009 ; Miller et al. 2012) and the effect  
141 to last at least 14 days (Zanchi et al., 2017). We generated double-stranded RNA  
142 (dsRNA) of a *tenecin 3* gene construct (Eurofins, Operon) which consisted in the  
143 sequence of the whole *tenecin 3* gene minus the sequence that was amplified by qPCR  
144 in order to confirm the efficiency of the knock-down of *tenecin 3* gene expression  
145 (Supplemental Information S1 figure S1). As a control, we used the dsRNA of the  
146 *Galleria mellonella* lysozyme, which has no homology of sequence with any known  
147 gene of *T. molitor* (Johnston & Rolff, 2015). The full sequences of the resulting



148 products as well as the qPCR primers and products are given in the Supplemental  
149 Information S1. The template for dsRNA synthesis was amplified from the constructs  
150 by PCR (KAPA2G Fast ReadyMix, KAPA Biosystems) using gene-specific primers  
151 tailed with the T7 polymerase promoter sequence (Metabion International AG). After  
152 checking the length of our amplicon on a 2 % agarose gel and cleanup (PCR DNA  
153 Clean-Up Kit, Roboklon), the resulting amplicon was used as a template for RNA  
154 synthesis (High Yield MEGAscript T7 kit, Applied Biosystems/Ambion) according to  
155 the manufacturer's recommendations. We then purified the RNA with a phenol-  
156 chloroform extraction and resuspended the pellet in a nuclease-free insect Ringer  
157 solution (128 mM NaCl, 18 mM CaCl<sub>2</sub>, 1.3 mM KCl, 2.3 mM NaHCO<sub>3</sub>). Before being  
158 used, the RNA was annealed by heating it up at 90°C and allowed to slowly cool down,  
159 in order to obtain dsRNA. We injected 500 ng of dsRNA per beetle at a concentration  
160 of 100 ng/μl in 5μL of insect Ringer solution. To do so, we chilled the insects on ice for  
161 10-15 minutes before dsRNA injection, which was performed with a sterile pulled  
162 glass capillary inserted into the pleural membrane below the elytra, directly into the  
163 hemocoel. Care was taken that the needle was parallel to the anterior/posterior axis of  
164 the beetle to avoid injury of the organs. Beetles that received the Tenecin 3 dsRNA  
165 will be referred to as “Ten3KD” whereas beetles that received *G. mellonella* dsRNA  
166 will be referred to as “control”.

167

168

## 169 **2.4. Fungal exposure and maintenance of infected beetles**

170 Exposures to *B. bassiana* were performed by applying a 0.5 µl droplet of conidia/PBS-  
171 TritonX solution prepared as described above on the intersegmental membrane  
172 between the sclerotized parts of the sternum and the abdomen. We performed the  
173 exposures 7 days after the injection of dsRNA. Care was taken so that the whole  
174 droplet was adsorbed on the membrane before placing the beetles individually at 23°C  
175 in medicine cups (Carl Roth GmbH) containing a 2x2cm wet filter paper in order to  
176 keep the humidity level high in the cup and stimulate *B. bassiana* conidia to  
177 germinate. Beetles were provided with food (ca. 5 g sterilized rolled oats) a day later in  
178 order to avoid the transfer of conidia in the medium. The filter papers were replaced  
179 every day, and the medicine cups along with the food were replaced every four days.

180

## 181 **2.5. Mortality bioassays**

182 We tested the effect of three different concentrations of *B. bassiana* conidia on beetles  
183 survival:  $1 \times 10^5$ ,  $5 \times 10^5$  and  $1 \times 10^6$  /ml, corresponding to 50, 250, 500 conidia applied per  
184 beetle, since previous laboratory experiments showed that these concentrations span  
185 the LC50 ( $3 \times 10^5$  conidia/ml) of the strain KVL 03-144 of *B. bassiana* (S. Maistrou,  
186 unpublished). As procedural control we included a group of beetles that each received  
187 only a 0.5 µl PBS-0.05% Triton-X solution. The beetles were maintained as described  
188 above and their mortality was checked daily for 14 days after exposure. All dead

189 beetles exposed to *B. bassiana* developed mycosis after death. Each treatment group  
190 consisted of 20 beetles and the bioassay was repeated twice. The final sample sizes are  
191 presented in the Supplemental Information S2 Figure S2.

192

## 193 **2.6. Recovery of hyphal bodies from the beetles hemolymph**

194 We chose to perform this experiment on beetles exposed to 0.5  $\mu$ l of  $5 \times 10^5$  conidia/ml  
195 since this was the concentration which yielded the biggest effect on mortality between  
196 Ten3KD and control beetles (Figure 1). Beetles exposed to *B. bassiana* were split into  
197 two groups of ~100 beetles/treatment (control or Ten3KD). Since hemolymph collection  
198 was an invasive process, it was performed only once per beetle. Therefore, at each time  
199 point (1, 2, 3, 4 and 5 days post infection) we collected the hemolymph of ~20 randomly  
200 selected beetles of each of the two treatment groups.

201 Before collection, beetles were chilled on ice (10-15 minutes) in a glass tube containing  
202 a piece of cotton soaked in ethyl-acetate and briefly dipped in 70% ethanol to remove  
203 any contamination from the cuticle. An incision was made above their genitals before  
204 inserting a hypodermic needle of a syringe containing 0.5 ml PBS which was  
205 subsequently perfused. The resulting haemolymph/PBS extract was collected into a  
206 microcentrifuge tube kept on ice. 100  $\mu$ L of this suspension was plated on SDA + 5  
207 mg/ml tetracyclin using sterile glass beads, and incubated at 23°C for 36 h (we  
208 established beforehand that tetracycline did not affect the growth of blastospores in

209 terms of speed of germination and density, data not shown). The number of colony  
210 forming units (CFU) on each plate was counted and used as a proxy to assess the  
211 concentration of *B. bassiana* hyphal bodies in the hemolymph of each individual beetle  
212 at a given time point. Few beetles died before the end of the experiment, which was  
213 compensated in our sample size by the fact that we injected slightly more than 100  
214 beetles at the start. Some cadavers developed mycosis as expected (i.e. succumbed to  
215 *B. bassiana* infection) ; there were 1 beetle in both the control and the Ten3KD while 2  
216 beetles in the control and 3 in the Ten3 KD treatment died without showing mycosis  
217 symptoms. The final sample sizes are presented in the Supplemental Information S2  
218 Figure S3.

219

## 220 **2.7. *In vitro* effect of Tenecin 3 on *Beauveria bassiana***

### 221 **2.7.1. Growth and collection of blastospores**

222 500 µl of conidial suspension ( $10^7$  conidia/ml) was added into a flask containing 100 ml  
223 of Sabouraud Dextrose broth + 10% yeast extract. The solution was incubated for 72-96  
224 h at 23 °C with agitation at 150 rpm, in order for the conidia to germinate. After  
225 incubation, the solution was filtered through a sterile filter paper (595 grade,  
226 Schleicher & Schuell) in order to recover the blastospores and discard the mycelium.  
227 The resulting solution was washed by centrifugation three times at 10 000 g and 25 °C  
228 for 10 minutes, and the pellet resuspended in 1ml PBS. The concentration of

229 blastospores in this solution was assessed in a hemocytometer, and adjusted to  $5.10^6$   
230 blastospores/ml.

231

### 232 **2.7.2. Survival of blastospores *in vitro* against a recombinant Tenecin 3**

233 We first established a growth curve of the *B. bassiana* strain KVL 03-144 in our  
234 experimental conditions in order to focus on a time point which was in the exponential  
235 phase for the rest of the experiments. The protocol and the growth curve are presented  
236 in the Supplemental Information S3.

237 We chose to carry out the rest of the next experiment on the 6 hour time point,  
238 corresponding to the beginning of the exponential growth phase. We inoculated 19.5  $\mu$ l  
239 of Sabouraud Dextrose broth with 0.5  $\mu$ l of blastospore solution ( $10^3$  blastospores) in  
240 the wells of a 96 well plate (Sarstedt). We added 5 $\mu$ l of a solution of water and  
241 recombinant Tenecin 3 resulting in a final concentration of 0.05, 0.1, 0.2, and 0.4 ng/ $\mu$ l  
242 of Tenecin 3. After incubation at 25 °C and agitation at 220 rpm for 6 h, we suspended  
243 the content of the wells in PBS up to 100  $\mu$ l and plated 100  $\mu$ l of serial dilutions by a  
244 factor of 10 and 100 on SDA. We incubated the Petri dishes at 23°C in the dark for 48  
245 hours after which we counted the number of CFU. As a control, we replaced Tenecin 3  
246 with bovine Serum Albumin (BSA) at the same concentrations. The process was  
247 repeated 5 times, with conidia originating from different culture plates.

248

## 249 **2.8. Data analysis**

250 All statistical analyses were performed using the R software (R Core Team, 2016).  
251 The survival of the beetles after *B. bassiana* exposure was analyzed with the “survreg”  
252 function of the 'survival' package (Therneau, 1999), since the hazards were not  
253 proportional between treatment (checked with the “coxph” function). We checked  
254 whether survival of the beetles was affected by the concentration in conidia of *B.*  
255 *bassiana* used for exposure and their knock-down treatment, as well as the interaction  
256 between them and the replicate as random factor, and with an exponential  
257 distribution. Both sham infected treatments showed a very low mortality and  
258 impaired the fit of the model, therefore we decided to exclude them during the  
259 analyses, but show them on the figure.

260 The concentration of hyphal bodies present in the hemolymph of the beetles was  
261 analyzed with a Generalized Linear Model fitted with a negative binomial distribution  
262 with the package 'MASS' (Venables & Ripley, 2002). We tested whether the  
263 concentration of hyphal bodies was explained by the knock down treatment and the  
264 time as well as their interaction, in order to highlight the dynamics of the progression  
265 of the infection.

266 The *in vitro* growth of blastospores in the presence of Tenecin 3, BSA or alone was  
267 compared using a Generalized Linear Mixed Model with a Poisson distribution  
268 corrected for overdispersion with the package 'lme4' (Bates, 2015), including the  
269 treatment (protein added, either BSA or Tenecin 3) as well as the protein

270 concentration as explanatory variables as well as the interactions between them, and  
271 the replicate as a random factor.

272 For all the analyses, we chose which distribution to use by checking the distribution of  
273 the residuals and comparing the estimates of the models with our data with the  
274 package 'visreg' (Breheny & Burchett, 2017). We then selected the best model by  
275 comparing the Akaike's Information Criterion (AIC) of the full models including  
276 interactions to all the nested models and the null model. We kept as the best models  
277 the ones with the lowest AICs (Akaike, 1976). Post hoc comparisons when relevant can  
278 be performed by comparing the 95% confidence intervals around the estimates of the  
279 models on the figures provided in the Supplemental Information S4. A difference  
280 between two treatments is deemed significant when the confidence intervals do not  
281 overlap on more than half of their length, as advised by Cumming (2009). The figures  
282 in the main body of the manuscript were made using the ggplot2 package (Wickham,  
283 2009), and the figures of the Supplemental Information were obtained with the  
284 package 'effects' (Fox & Hong, 2009).

285

## 286 **3. Results**

### 287 **3.1. Survival of the beetles after *B. bassiana* exposure**

288 There was no effect of the concentration of conidia applied on the beetles for infection  
289 either in interaction with the treatment (concentration\*treatment:  $X^2_{6,243} = 9.12$  ;  $p =$

290 0.17) or alone ( $X^2_{3,246} = 0.85$  ;  $p = 0.84$ ) across the range of concentrations we checked.

291 The knock-down of Tenecin 3 significantly reduced survival of the beetles after *B.*

292 *bassiana* exposure ( $X^2_{2,247} = 8.13$  ;  $p = 0.017$  ; LT50 control = 7.5 days ; LT50 Ten3KD =

293 5.5 days).

294 We then decided to keep investigating the effect of the knock-down treatment in

295 beetles exposed to 0.5  $\mu$ l of  $5 \times 10^5$  conidial/ml (~ 250 conidia) on the *in vivo* progression

296 of the infection over 5 days, after which the mortality of the beetles would have biased

297 our sampling between treatments.

298



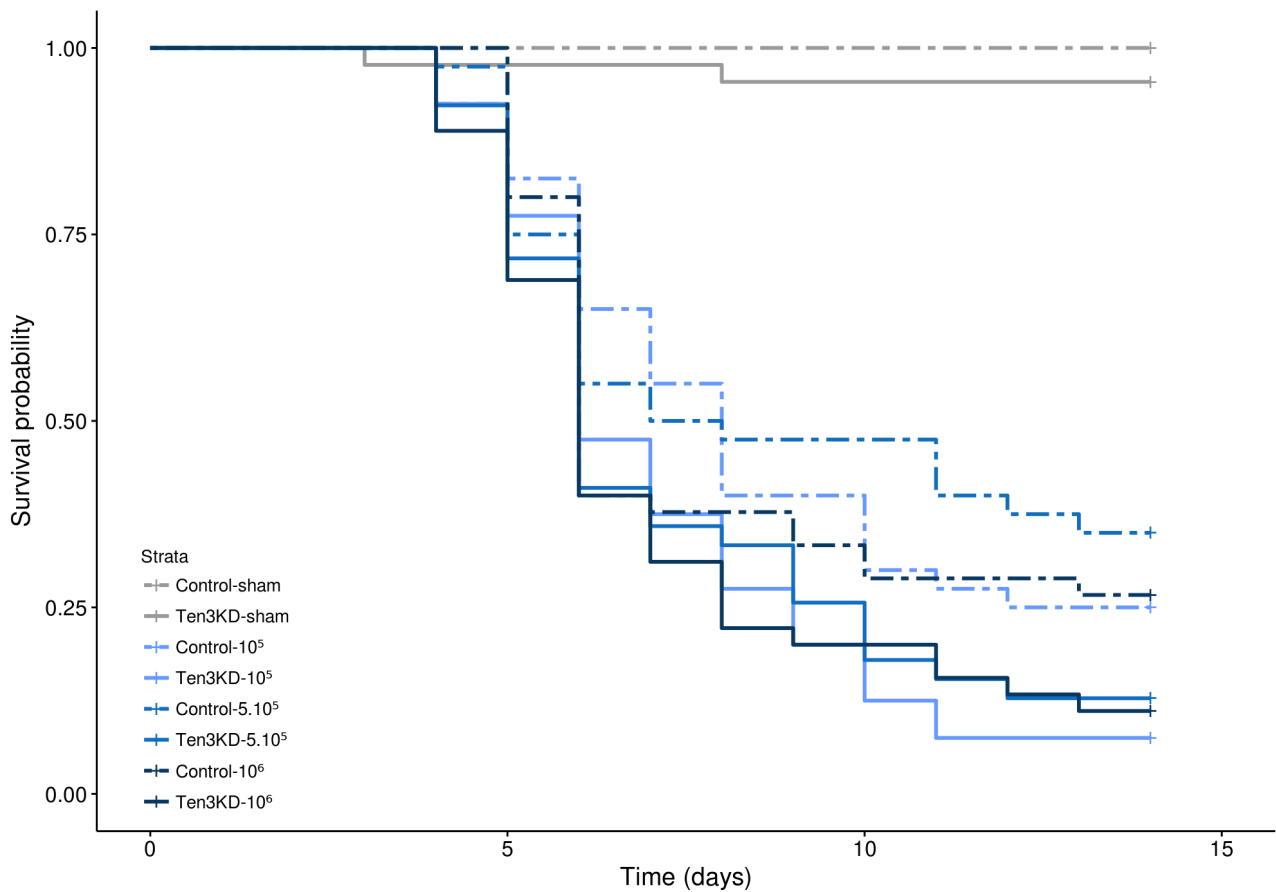

300 **Figure 1 : Tenecin 3 improves the survival of *Tenebrio molitor* to *Beauveria***  
301 ***bassiana*.** Kaplan-Meier curve showing the survival over 14 days of the control  
302 (dashed lines) and Tenecin 3 knock-down (solid lines) beetles either sham (in grey) or  
303 exposed to *Beauveria bassiana* (in blue, lighter to darker shades indicating lower to  
304 higher concentrations : light blue = 10<sup>5</sup> conidia/mL ; medium blue = 5.10<sup>5</sup> conidia/mL ;  
305 dark blue = 10<sup>6</sup> conidia/mL). Only the knock-down treatment had a significant effect  
306 on survival of the beetles (dashed vs. solid lines,  $X^2_{2,247} = 8.13$  ;  $p = 0.017$ ).

307

308

309 **3.2. Progression of the infection in the beetle host.**

310 Very few hyphal bodies could be recovered from the early time points (less than 10 and  
311 less than 50 on the first and second day post infection respectively, see Figure 2). Both  
312 control and Ten3KD treatments showed similar dynamics of the progression of the  
313 infection, i.e. there was no interaction between time and treatment on the number of  
314 hyphal bodies recovered from the beetles (time\*treatment :  $X^2_{3,202} = 1.28$  ;  $p = 0.257$ ).  
315 However, both the treatment and time affected the concentration of hyphal bodies  
316 present in the beetles as simple effects. Ten3KD beetles contained overall more hyphal  
317 bodies than control beetles (treatment :  $X^2_{1,203} = 7.61$  ;  $p = 0.00578$ ). As expected, the  
318 concentration of hyphal bodies increased over time (time :  $X^2_{1,203} = 211.205$  ;  $p <$   
319  $0.0001$ , see Supplemental Information S4 Figure S5 for post hoc comparisons).

320

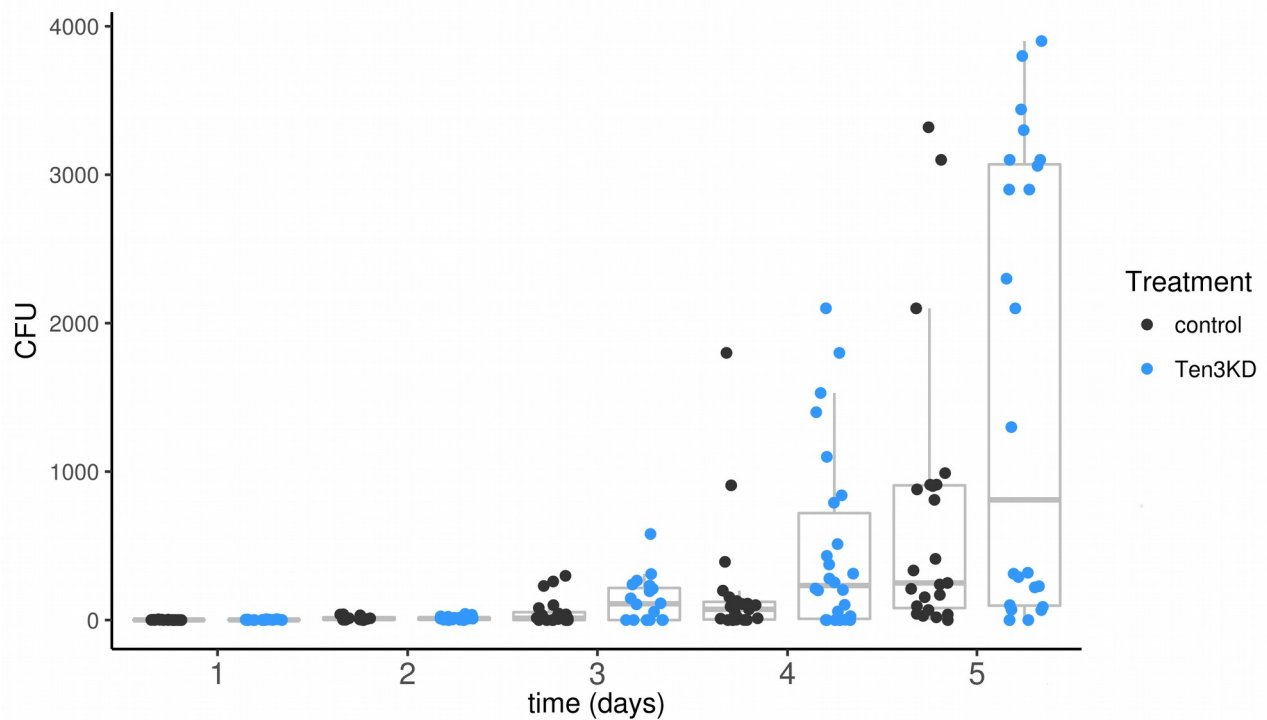

321 **Figure 2 : Tenecin 3 decreases the fungal load of *Beauveria bassiana* in the**  
322 **hemolymph of *Tenebrio molitor*.** Box-dotplot representing the number of CFU of *B.*  
323 *bassiana* recovered from the hemolymph of infected beetles according to the time after  
324 infection. Each dot represents a data point of control (grey) and Tenecin 3 knock-down  
325 (in blue) beetles. The boxplots represent the first to the third quartiles around the  
326 median (horizontal grey line) , and the vertical bars the 1.5 interquartile of the lower  
327 and upper quartiles. Both time and treatment affect the fungal load in the hemolymph  
328 of the beetles, see Supplemental Information S4 Figure S5 for post-hoc comparisons.

329

330 Moreover, an interesting pattern emerges from the distribution of our data. The  
331 quantity of hyphal bodies present in the beetles seems to evolve over time towards a

332 bimodal distribution (Figure 2), which is very obvious at 5 days post infection. By  
333 setting a cut-off at 600 CFU at this time point we can determine that in the control,  
334 39.1% of the data points are above this threshold, versus 50.0% for the Ten3KD. By  
335 looking at the survival curves of the two treatments in the corresponding  
336 concentration ( $5 \cdot 10^5$  conidia/mL, Figure 1 in medium blue) it appears that they  
337 diverge at 6 days post-infection and remain relatively parallel after this time point.  
338 The proportions of dead beetles at this point are 45.0 and 59.0% for control and  
339 Ten3KD respectively (Figure 1). While the 24 h time frame of our sampling does not  
340 allow us to capture the concentration of hyphal bodies present in the hemolymph of  
341 the beetles immediately prior to death, we can observe that these values are not too  
342 different from the proportion of the beetles who carried more than 600 CFU at day 5  
343 (Figure 2).

### 344 345 **3.3. In vitro killing of *B. bassiana* blastospores by recombinant Tenecin 3**

346 We investigated whether the lower concentration in hyphal bodies in the hemolymph  
347 of control beetles compared to Ten3KD beetles could be due to a direct effect of  
348 Tenecin 3 on *B. bassiana* hyphal bodies. We exposed blastospores (hyphal bodies  
349 generated *in vitro*) to a recombinant Tenecin 3 or to BSA as a control at different  
350 concentrations for 6 hours, and compared the concentration of blastospores recovered  
351 after incubation.

352 Tenecin 3 affected the number of blastospores in the medium differently than BSA at  
353 higher concentrations (0.2 and 0.4 ng/ $\mu$ l : concentration \* treatment :  $X^2_{8,34} = 552.56$  ; p  
354 < 0.001, see Supplemental Information 4 Figure S6 for post-hoc comparisons). The  
355 number of blastospores was lower when incubated at both 0.2 and 0.4 ng/ $\mu$ l of Tenecin  
356 3 compared to the inoculum, suggesting a fungicidal effect of Tenecin 3 on *B. bassiana*  
357 **(Figure 3)**.

358

359

360

361

362

363

364

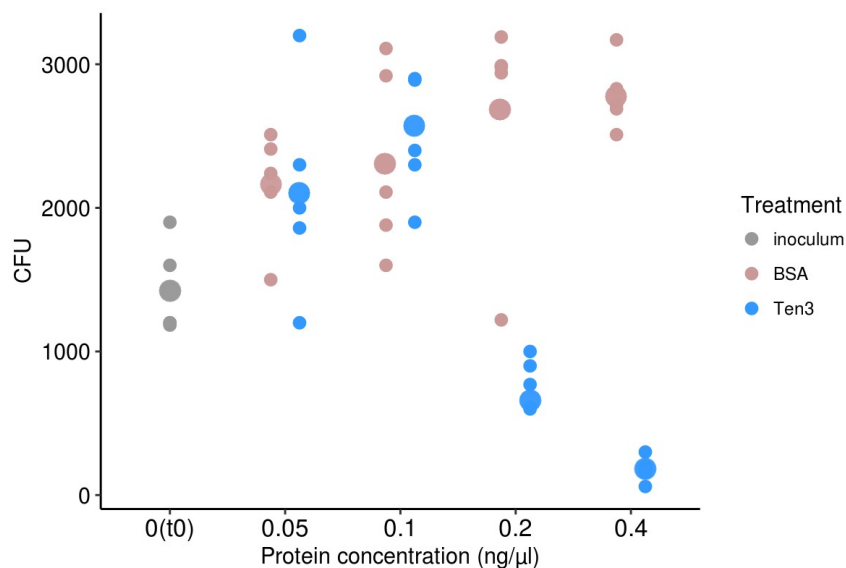

365 **Figure 3 : Recombinant Tenecin 3 has an antifungal activity against the**  
366 **blastospores of *Beauveria bassiana in vitro*.** Dotplot representing the number of  
367 CFU retrieved after *in vitro* incubation of blastospores for 6 hours with either Bovine  
368 Serum Albumin (BSA, in pink) or recombinant Tenecin 3 (in blue). Five replicates  
369 were performed, each dot represents a data point and the thicker dot represents the  
370 mean. The blastospore solution (around  $10^3$  conidia) was plated after inoculation and

371 is represented in grey as “0(t0)”, meaning a concentration of 0 and time point 0.  
372 Starting from 0.2ng/μL, Tenecin 3 has a fungicidal effect on the blastospores of *B.*  
373 *bassiana*, see Supplemental Information S4 Figure S6 for post hoc comparisons.

374

#### 375 **4. Discussion**

376 We found that the constitutively expressed antifungal peptide Tenecin 3 increases  
377 beetle survival to a *B. bassiana* infection. This is mirrored by a clear antifungal effect  
378 of Tenecin 3 on *B. bassiana* blastospores *in vitro*.

379 Antimicrobial peptides of insects are well studied in the context of bacterial infections,  
380 in which case they are mostly inducible (Bulet & Stöcklin, 2005). By comparison, *in*  
381 *vivo* studies on antifungal peptides in the context of fungal infections established  
382 through the natural route are scarce. The constitutive expression of Drosomycin, an  
383 otherwise inducible antifungal peptide, in adult *Drosophila melanogaster* (Diptera:  
384 Drosophilidae) mutants deficient for both the Toll and Imd pathways, restored the  
385 wild-type survival to opportunistic or human pathogenic fungi injected in the flies but  
386 did not improve survival to a natural infection with *B. bassiana* (Tzou et al., 2002).  
387 Termicin, an antifungal peptide constitutively expressed in the salivary glands of  
388 some species of termites has been shown to increase the survival of *Reticulitermes*  
389 *flavipes* to a *Metarhizium anisopliae* infection (Hamilton & Bulmer, 2012). The first  
390 result can seem counterintuitive considering that Drosomycin is elicited following *B.*

391 *bassiana* infection (Lemaître et al. 1997). In the second case, it is likely that the  
392 selection pressure exerted by fungal pathogens is constant in the environment of these  
393 species of termites, making the evolution of an external constitutive antifungal  
394 defense relevant (Bulmer & Crozier, 2004 ; Adler & Karban, 1994). In *T. molitor*, by  
395 performing knock-downs of the Toll pathway, Yang et al. (2017) highlighted the  
396 importance of inducible immune defenses in the survival to *B. bassiana*, although the  
397 authors did not directly knock-down the inducible AMPs suspected to be involved,  
398 whereas the role of the constitutive Tenecin 3 was not investigated. Even though the  
399 pressure exerted by *B. bassiana* on *T. molitor* in its natural habitat is unknown, *B.*  
400 *bassiana* is widespread in most ecosystems investigated (e.g. Meyling et al. 2011 ;  
401 Hajek & Meyling 2018 ; Eilenberg et al. 2015) and we could expect that similarly to  
402 what is observed in the aforementioned termite species, the fact that a constitutively  
403 expressed antifungal peptide improves the survival of *T. molitor* during a *B. bassiana*  
404 infection indicates that Tenecin 3 might have evolved as a way to fight off fungal a  
405 constant selection pressure exerted by fungal pathogens in the environment. If this is  
406 the case, the changes of its expression patterns during development (Lee et al., 1996)  
407 might even indicate that this pressure is stage-dependent. Since other AMPs are  
408 induced in *T. molitor* following *B. bassiana* infection through the Toll pathway (Yang  
409 et al., 2017), a future lead to follow could be to perform knock-down on these peptides  
410 simultaneously, which would shed light on the interplay of constitutive and inducible  
411 immune defenses.

412 Our study also adds support to previous observations made in *D. melanogaster* that  
413 the evolution of the pathogen load inside the host over time can show a bimodal  
414 outcome, where one category of hosts carry a low level infection while the other  
415 category will die of high infection levels (Clemmons et al., 2015 ; see Duneau et al.,  
416 2017 for data & review). Similarly to Duneau et al. (2017), the quantity of hyphal  
417 bodies present in the beetles at a certain time point seems to be responsible for their  
418 mortality, and suggests that there is a threshold pathogenic load which needs to be  
419 reached by the fungus in order to kill the host. However the overall pattern of  
420 progression of the infection differs compared to these previous studies : while after  
421 injection of bacteria in both *D. melanogaster* and *T. molitor* there is an immediate  
422 dramatic decrease of the pathogen load in the host, our present infections seems more  
423 to build-up from a low load in the hosts hemolymph. In these previous studies a high  
424 concentration of bacteria was directly injected into the hemolymph, bypassing the  
425 cuticular barrier. With this protocol, Zanchi et al. (2017) did not find an effect of the  
426 knock down of various AMPs on the early stages of the infection, but instead an  
427 increased bacterial load and dispersion of the bacterial counts in later time points  
428 after infection. Our present study therefore confirms this result in the case of a  
429 natural infection, which can be considered like an ecologically relevant setting.

430

431 To conclude, we show that the direct antifungal activity of Tenecin 3 on *B. bassiana*  
432 protects *T. molitor* against the internal progression of infection by this fungus. While



433 many current studies focus on insect defenses which prevent the infection from being  
434 initiated, the role of the immune system of the hemolymph in host resistance to  
435 entomopathogenic fungi should not be underestimated. Understanding the  
436 contribution of specific elements of the insect immune system in the resistance  
437 towards *B. bassiana* can help explain the success or failure of biocontrol strategies, as  
438 well as improve our understanding of the evolution of constitutive antifungal peptides  
439 as a defense mechanism.

440

## 441 **5. Acknowledgements**

442 We thank P. R. Johnston, O. Makarova & A. Rodriguez Rojas for useful insight and  
443 comments on our experiments, and N. Demandt for useful advice on statistical  
444 analyses.

445

446 **Funding** : This research was funded by the ERC (Grant n° 260986) and the  
447 University of Copenhagen.

448 **6. References**

449 Akaike, H., 1976. Canonical correlation analysis of time series and the use of an  
450 information criterion. Academic Press Inc.

451 Adler, F.R., Karbn, R., 1994. Defended Fortresses or Moving Targets? Another Model  
452 of Inducible Defenses Inspired by Military Metaphors. *Am. Nat.* 144:813:832.

453 Bates, D., Maechler, M., Bolker, B., Walker, S., 2015. Fitting Linear Mixed-Effects  
454 Models Using lme4. *Journal of Statistical Software*, 67(1), 1-48.  
455 doi:10.18637/jss.v067.i01.

456 Bidochka, M.J., Kachatourians, G.G., 1991. The implications of metabolic acids  
457 produced by *Beauveria bassiana* in pathogenesis of the migratory grasshopper,  
458 *Melanopus sanguinipes*. *J. Invertebr. Pathol.* 85:106-117.

459 Boomsma, J.J., Jensen, A.B., Meyling, N.V., Eilenberg, J., 2014. Evolutionary  
460 interactions networks of insect pathogenic fungi. *Annu. Rev. Entomol.* 59:467–85.

461 Boyle, D., Cutler, C.G., 2012. Effects of insect activity, soil, and cuticular factors on  
462 virulence of *Beauveria bassiana* toward *Blissus leucopterus hirtus*. *J. Pest Sci.* 85:505-  
463 512.

464 Breheny P., Burchett W., 2017. Visualization of Regression Models Using visreg. *The*  
465 *R Journal*, 9: 56-71.

- 466 Broome, J.R., Sikorowski, P.P., Norment, A., 1976. A mechanism of pathogenicity of  
467 *Beauveria bassiana* on larvae of the imported fire ant, *Solenopsis richteri*. J. Invertebr.  
468 Pathol. 28:87-91.
- 469 Bulet, P., Hetru, C., Dimarcqu, J.L., Hoffmann, D., 1999. Antimicrobial peptides in  
470 insects; structure and function. Dev. Comp. Immunol. 23:329-344.
- 471 Bulet, P., Stöcklin, R., 2005. Insect antimicrobial peptides: structures, properties and  
472 gene regulation. Protein Pept. Lett. 12:3-11.
- 473 Bulmer, M.S., Crozier, R.H., 2004. Duplication and diversifying selection among  
474 termite antifungal peptides. Mol. Evol. Biol. 21:2256-2264.
- 475 Butt, T.M., Coates, C.J., Dubovskiy, I.M., Ratcliffe, N.A., 2016. Entomopathogenic  
476 fungi: new insights into host-pathogen interactions. Adv. Genet. 94:37-364.
- 477 Clark, T.B., Kellen, W.R., Fukuda, T. Lindegren, J.E., 1968. Field and laboratory  
478 studies on the pathogenicity of the fungus *Beauveria bassiana* to three genera of  
479 mosquitoes. J. Invertebr. Pathol. 11:1-7.
- 480 Clemmons, A.W., Lindsay, S.A., Wasserman, S.A., 2015. An effector peptide family  
481 required for *Drosophila* Toll-mediated immunity. PloS Pathog. 11:e1004876.
- 482 Culliney, T.W., Grace, J.K., 2000. Prospects for the biological control of subterranean  
483 termites (Isoptera: rhinotermitidae), with special reference to *Coptotermes*  
484 *formosanus*. Bull. Entomol. Res. 90:9-21.

- 485 Cumming, G., 2009. Inference by eye: reading the overlap of independent confidence  
486 intervals. *Stat. Med.* 28:205-220.
- 487 Duneau, D., Ferdy, J.B., Revah, J., Kondolf, H., Ortiz, G.A., Lazzaro, B.P., Buchon, N.,  
488 2017. Stochastic variation in the initial phase of bacterial infection predicts the  
489 probability of survival in *Drosophila melanogaster*. *Elife* 6. pii: e28298. doi:  
490 10.7554/eLife.28298.
- 491 Eilenberg, J., Vlak, J.M., Nielsen-LeRoux, C., Cappellozza, S., Jensen, A.B., 2015.  
492 Diseases in insects produced for food and feed. *Journal of Insects as Food and Feed*  
493 1:87-102.
- 494 Ekengren, S., Hultmark, D., 1999. *Drosophila* cecropin as an antifungal agent. *Insect*  
495 *Biochem. Mol. Biol.* 29:965-972.
- 496 Fabrick, J., Oppert, C., Lorenzen, M.D., Morris, K., Oppert, B., Jurat-Fuentes, J.L.,  
497 2009. A novel *Tenebrio molitor* cadherin is a functional receptor for *Bacillus*  
498 *thuringiensis* Cry3Aa toxin. *J. Biol. Chem.* 284:18401-18410.
- 499 Fehlbaum, P., Bulet, P., Michaut, L., Lagueux, M., Broekaert, W.F., Hetru, C.,  
500 Hoffmann, J.A., 1994. Insect immunity. Septic injury of *Drosophila* induces the  
501 synthesis of a potent antifungal peptide with sequence homology to plant antifungal  
502 peptides. *J. Biol. Chem.* 269:33159-33163.
- 503 Ferron, P. 1978., Biological control of insect pests by entomogenous fungi. *Annu. Rev.*  
504 *Entomol.* 23:409-442.

- 505 Fischer, M.C., Henk, D.A., Briggs, C.J., Brownstein, J.S., Madoff, L.C., McCraw, S.L.,  
506 Gurr, S.J., 2012. Emerging fungal threats to animal, plant and ecosystem health.  
507 Nature 484:186–194.
- 508 Fox, J., Hong, J., 2009. Effect Displays in R for Multinomial and Proportional-Odds  
509 Logit Models: Extensions to the effects Package. Journal of Statistical Software, 32(1),  
510 1-24. URL <http://www.jstatsoft.org/v32/i01/>.
- 511 Gao B., Zhu S.Y., 2008. Differential potency of drosomycin to *Neurospora crassa* and  
512 its mutant: implications for evolutionary relationship between defensins from insects  
513 and plants. Insect Mol. Biol. 17:405–411.
- 514 Gillespie, J.P., Bailey, A.M., Cobb, B., Vilcinskis, A., 2000. Fungi as elicitors of insect  
515 immune responses. Arch. Insect Biochem. Physiol. 44:49-68.
- 516 Hajek, A.E., St. Leger R.J., 1994. Interactions between fungal pathogens and insect  
517 hosts. Annu. Rev. Entomol. 39:293-322.
- 518 Hajek, A.E., Meyling, N.V., 2018. Ecology of invertebrate pathogens: Fungi. In:  
519 Ecology of Invertebrate Diseases (Eds. Hajek AE & Shapiro-Ilan D) John Wiley &  
520 Sons Ltd. ISBN: 978-1-119-25607-6.
- 521 Hamilton, C., Bulmer, M.S., 2012. Molecular antifungal defenses in subterranean  
522 termites: RNA interference reveals in vivo roles of termicins and GNBPs against a  
523 naturally encountered pathogen. Dev. Comp. Immunol. 36:372-377. doi:  
524 10.1016/j.dci.2011.07.008.

- 525 Hancock, R.E., Diamond, G., 2000. The role of cationic antimicrobial peptides in innate  
526 host defences. *Trends Microbiol.* 8:402-410.
- 527 Hesketh, H., Roy, H.E., Eilenberg, J., Pell, J.K., Hails, R.S., 2010. Challenges in  
528 modelling complexity of fungal entomopathogens in semi-natural populations of  
529 insects. *BioControl* 55:55-73.
- 530 Iijima, R., Kurata, S., Natori, S., 1993. Purification, characterization, and cDNA  
531 cloning of an antifungal protein from the hemolymph of *Sarcophaga peregrina* (flesh  
532 fly) larvae. *J. Biol. Chem.* 268:12055-12061.
- 533 Inglis, G.D., Goettel, M.S., Butt, T.M., Strasser, H., 2001. Use of Hyphomycetous fungi  
534 for managing insect pests. In: Butt T.M., Jackson C., Magan N. (Eds.) *Fungi as*  
535 *biological control agents: progress, problems and potential.* CABI Publishing, Oxon, pp  
536 23–69.
- 537 Johnston, P.R., Makarova, O., Rolff, J., 2014. Inducible defenses stay up late: temporal  
538 patterns of immune gene expression in *Tenebrio molitor*. *G3* 4:947-955.
- 539 Johnston, P.R., Rolff, J., 2015. Host and Symbiont Jointly Control Gut Microbiota  
540 during Complete Metamorphosis. *PloS Pathog.* 11:e1005246. Doi:  
541 10.1371/journal.ppat.1005246.
- 542 Joop, G., Vilcinskas, A., 2016. Coevolution of parasitic fungi and insect hosts. *Zoology*  
543 119:350-358.

- 544 Kim, D.H., Lee, Y.J., Lee, Y.J., Chung, J.H., Lee, B.L., Choi, B.S., Lee, Y., 1998.  
545 Bacterial expression of Tenecin 3, an insect antifungal protein isolated from *Tenebrio*  
546 *molitor*, and its efficient purification. *Mol. Cells* 8:786-789.
- 547 Kim, D.H., Lee, D.G., Kim, K.L., Lee, Y., 2001. Internalization of Tenecin 3 by a fungal  
548 cellular process is essential for its fungicidal effect on *Candida albicans*. *Eur. J.*  
549 *Biochem.* 268:4449:4458.
- 550 Kirkland, B.H., Westwood, G.S., Keyhani, N.O., 2004. Pathogenicity of  
551 Entomopathogenic Fungi *Beauveria bassiana* and *Metarhizium anisopliae* to Ixodidae  
552 Tick Species *Dermacentor variabilis*, *Rhipicephalus sanguineus*, and *Ixodes scapularis*.  
553 *J. Med. Entomol.* 41:705-711.
- 554 Lacey, L.A., Grzywacz, D., Sapiro-Ilan, D.I., Frutos, R., Brownbridge, M., Goettel,  
555 M.S., 2015. Insect pathogens as biological control agents: back to the future. *J.*  
556 *Invertebr. Pathol.* 132:1-41.
- 557 Lamberty, M., Caille, A., Landon, C., Tassin-Moindrot, S., Hetru, C., Bulet, P.,  
558 Vovelle, F., 2001a. Solution structures of the antifungal heliomycin and a selected  
559 variant with both antibacterial and antifungal activities. *Biochemistry* 40:11995-2003.
- 560 Lamberty, M., Zachary, D., Lanot, R., Bordereau, C., Robert, A., Hoffmann, J.A.,  
561 Bulet, P., 2001b. Insect immunity. Constitutive expression of a cysteine-rich  
562 antifungal and a linear antibacterial peptide in a termite insect. *J. Biol. Chem.*  
563 276:4085-4092.

- 564 Lee, Y.J., Chung, T.J., Park, C.W., Hahn, Y., Chung, J.H., Lee, B.L., Han, D.M., Jung,  
565 Y.H., Kim, S., Lee, Y., 1996. Structure and expression of the tenecin 3 gene in  
566 *Tenebrio molitor*. Biochem. Biophys. Res. Commun. 218:6-11.
- 567 Lemaître, B., Reichhart, J.M., Hoffmann, J.A., 1997. *Drosophila* host defense:  
568 differential induction of antimicrobial peptide genes after infection by various classes  
569 of microorganisms. Proc. Natl. Acad. Sci. USA. 94:14614-14619.
- 570 Levashina, E.A., Ohresser, S., Bulet, P., Reichart, J.M., Hetru, C., Hoffmann, J.A.,  
571 1995. Metchnikowin, a novel immune-inducible proline-rich peptide from *Drosophila*  
572 with antibacterial and antifungal properties. Eur. J. Biochem. 233:694-700.
- 573 Li, Y., Zhao, P., Liu, S., Dong, Z., Chen, J., Xiang, Z., Xia, Q., 2012. A novel protease  
574 inhibitor in *Bombyx mori* is involved in defense against *Beauveria bassiana*. Insect  
575 Biochem. Mol.Biol. 42:766-775.
- 576 Liu, Z., Yuan, K., Zhang, R., Ren, X., Liu, X., Zhao, S., Wang, D., 2016. Cloning and  
577 purification of the first termicin-like peptide from the cockroach *Eupolyphaga sinensis*.  
578 J. Venom Anim. Toxins Incl. Trop. Dis. 22:5
- 579 Lopes, R.B., Laumann, R.A., Blassioli-Moraes, M.C., Borges, M., Faria, M., 2015. The  
580 fungistatic and fungicidal effects of volatiles from metathoracic glands of soybean-  
581 attacking stink bugs (Heteroptera: Pentatomidae) on the entomopathogen *Beauveria*  
582 *bassiana*. J. Invertebr. Pathol. 132:77-85.



- 583 Lord, J.C., Anderson, S., Stanley, D.W., 2002. Eicosanoids mediate *Manduca sexta*  
584 cellular response to the fungal pathogen *Beauveria bassiana*: a role for the  
585 lipoxygenase pathway. Arch. Insect Biochem. Physiol. 51:46-54.
- 586 Lu, D., Geng, T., Hou, C., Huang, Y., Qin, G., Guo, X., 2016. *Bombyx mori* cecropin A  
587 has a high antifungal activity to entomopathogenic fungus *Beauveria bassiana*. Gene.  
588 583:29-35.
- 589 Makarova, O., Rodríguez-Rojas, A., Ervaci, M., Weise, C., Dobson, A., Johnston, P.R.,  
590 Rolff, J., 2016. Antimicrobial defence and persistent infection in insects revisited.  
591 Philos. Trans. R. Soc. Lond. B Biol. Sci. 371 (1965).
- 592 Marti, G.A., Scorsetti, A.C., Siri, A., Lastra, C.C., 2005. Isolation of *Beauveria*  
593 *bassiana* (Bals.) Vuill. (Deuteromycotina: Hyphomycetes) from the Chagas disease  
594 vector, *Triatoma infestans* (Hemiptera: Reduviidae) in Argentina. Mycopathologia  
595 159:389-391.
- 596 Meyling, N.V., Thorup-Kristensen, K., Eilenberg, J., 2011. Below- and aboveground  
597 abundance and distribution of fungal entomopathogens in experimental conventional  
598 and organic cropping systems. Biol. Control 59: 180-186.
- 599 Miller, S.C., Miyata, K., Brown, S.J., Tomoyasu, Y., 2012. Dissecting systemic RNA  
600 interference in the red flour beetle *Tribolium castaneum*: parameters affecting the  
601 efficiency of RNAi. PLoS One 7:e47431. doi: 10.1371/journal.pone.0047431.

- 602 Mylonaki, E., Podsiadlowski, L., Muhammed, M., Vilcinskas, A., 2016. Diversity,  
603 evolution and medical applications of insect antimicrobial peptides. *Philos. Trans. R.*  
604 *Soc. Lond. B Biol. Sci.* 371:20150290.
- 605 Ortiz-Urquiza, A., Keyhani, N.O., 2013. Action on the Surface: Entomopathogenic  
606 Fungi versus the Insect Cuticle. *Insects* 4:357-374.
- 607 Pedrini, N., Ortiz-Urquiza, A., Huarte-Bonnet, C., Zhang, S., Keyhani, N.O., 2013.  
608 Targeting of insect epicuticular lipids by the entomopathogenic fungus *Beauveria*  
609 *bassiana*: hydrocarbon oxidation within the context of a host-pathogen interaction.  
610 *Front. Microbiol.* 15:4-24.
- 611 Peschel, A., Sahl, H.G., 2006. The co-e-evolution of host cationic antimicrobial peptides  
612 and microbial resistance. *Nat. Rev. Microbiol.* 4:529-536.
- 613 Poulsen, M., Bot, A.N., Nielsen, M.G., Boomsma, J.J., 2002. Experimental evidence for  
614 the costs and hygienic significance of the antibiotic metapleural gland secretion in  
615 leaf-cutting ants. *Behav. Ecol. Sociobiol.* 52:151-157.
- 616 R Development Core Team (2008). R: A language and environment for statistical  
617 computing. R Foundation for Statistical Computing, Vienna, Austria. ISBN 3-900051-  
618 07-0, URL <http://www.R-project.org>.
- 619 Samuels, R.I., Charnley, A.K., Reynolds, S.E., 1988. The role of destruxins in the  
620 pathogenicity of 3 strains of *Metarhizium anisopliae* for the tobacco hornworm  
621 *Manduca sexta*. *Mycopathologia* 104:51-58.

- 622 Schmid-Hempel, P., 2005. Evolutionary ecology of insect immune defenses. *Annu. Rev.*  
623 *Entomol.* 50:529-551.
- 624 Schuhmann, B., Seitz, V., Vilcinskas, A., Podsiadlowski, L., 2003. Cloning and  
625 expression of gallerimycin, an antifungal peptide expressed in immune response of  
626 greater wax moth larvae, *Galleria mellonella*. *Arch. Insect Biochem. Physiol.* 53:125-  
627 133.
- 628 Souhail, A., Hiromasa, Y., Rahnamaeian, M., Giraldo, M.C., Takahashi, D., Valent, B.,  
629 Vilcinskas, A., Kanost, M.R., 2016. Characterization and regulation of expression of an  
630 antifungal peptide from hemolymph of an insect, *Manduca sexta*. *Dev. Comp.*  
631 *Immunol.* 61:258-268.
- 632 Therneau, T., 2015. A Package for Survival Analysis in S. version 2.38,  
633 <https://survival>.
- 634 Tian, C., Gao., B., Rodriguez Mdel, C., Lanz-Mendoza, H., Ma, B., Zhu, S., 2008. Gene  
635 expression, antiparasitic activity, and functional evolution of the drosomycin family.  
636 *Mol Immunol* 45:3909–3916.
- 637 Tzou, P., Reichhart, J.M., Lemaître, B., 2002. Constitutive expression of a single  
638 antimicrobial peptide can restore wild-type resistance to infection in immunodeficient  
639 *Drosophila* mutants. *Proc. Natl. Acad. Sci. USA.* 99:2152:2157.

- 640 Valero-Jiménez, C.A., Wieggers, H., Zwaan, B.J., Koenraadt, C.J., van Kan, J.A., 2016.  
641 Genes involved in virulence of the entomopathogenic fungus *Beauveria bassiana*. *J.*  
642 *Invertebr. Pathol.* 133:41-49.
- 643 Venables, W. N. & Ripley, B. D., 2002. *Modern Applied Statistics with S*. Fourth  
644 Edition. Springer, New York. ISBN 0-387-95457-0.
- 645 Wickham, H., 2009. *ggplot2: Elegant Graphics for Data Analysis*. Springer-Verlag  
646 New York.
- 647 Yang, W.Y., Wen, S.Y., Huang, Y.D., Ye, M.Q., Deng ,X.J., Han, D., Xia, Q.Y., Cao, Y.,  
648 2006. Functional divergence of six isoforms of antifungal peptide Drosomycin in  
649 *Drosophila melanogaster*. *Gene* 379:26-32.
- 650 Yang, Y.T., Lee, M.R., Lee, S.J., Kim, S., Nai, Y.S., Kim, J.S., 2017. *Tenebrio molitor*  
651 Gram-negative-binding protein 3 (TmGNBP3) is essential for inducing downstream  
652 antifungal Tenecin 1 gene expression against infection with *Beauveria bassiana* JEF-  
653 007. *Insect Sci.* doi: 10.1111/1744-7917.12482.
- 654 Yokoi, K., Koyama, H., Minakuchi, C., Tanaka, T., Miura, K., 2012. Antimicrobial  
655 peptide gene induction, involvement of Toll and IMD pathways and defense against  
656 bacteria in the red flour beetle, *Tribolium castaneum*. *Results Immunol.* 2:72-82.
- 657 Yuan, Y., Gao, B., Zhu, S., 2007. Functional expression of a *Drosophila* antifungal  
658 peptide in *Escherischia coli*. *Protein Expr. Purif.* 52:457-462.

- 659 Zanchi, C., Johnston, P.R., Rolff, J., 2017. Evolution of defence cocktails: Antimicrobial  
660 peptide combinations reduce mortality and persistent infection. *Mol. Ecol.*  
661 *26:5334:5343.*
- 662 Zasloff, M., 2002. Antimicrobial peptides of multicellular organisms. *Nature* 415:389-  
663 395.
- 664 Zhang., Zhu, S.Y., 2009. Drosomycin, an essential component of antifungal defence in  
665 *Drosophila*. *Insect Mol. Biol.* 18:549-556.
